# Supplementary material for: A novel electrochemical sensor based on zirconia/ordered macroporous polyaniline for ultrasensitive detection of pesticides
Source: Royal Society of Chemistry journal article supplement (doi:10.1039/c4an00981a), 2014-11-07
Supplement: c4an00981a1.pdf [file c4an00981a1.pdf]

## Supporting Information

# A novel electrochemical sensor based on zirconia/ordered macroporous polyaniline for ultrasensitive detection of pesticides

Yonglan Wang,<sup>a</sup> Jun Jin,<sup>b</sup> Caixia Yuan,<sup>a</sup> Fan Zhang,<sup>a</sup> Linlin Ma,<sup>a</sup> Dongdong Qin,<sup>a</sup>  
Duoliang Shan,<sup>a</sup> Xiaoquan Lu <sup>\*a</sup>

### Results and discussion

Figure S1.

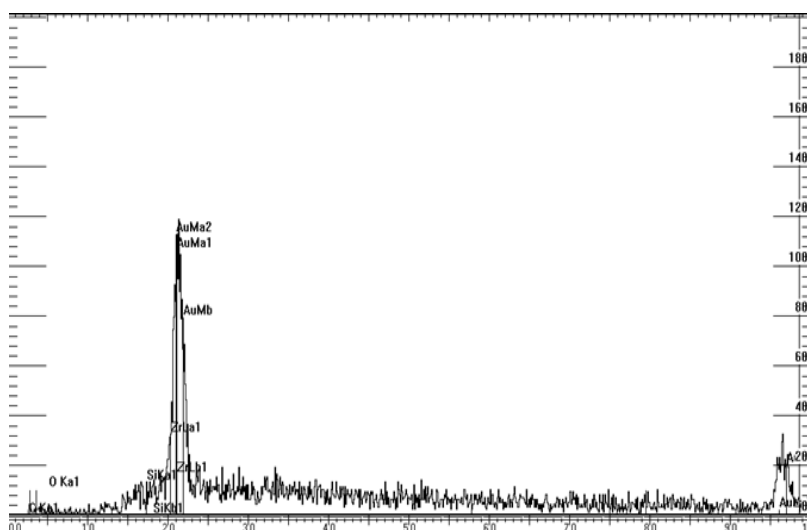

Table S1.

| element | C     | N     | O     | Zr    |
|---------|-------|-------|-------|-------|
| Wt%     | 49.87 | 23.48 | 15.46 | 11.19 |

Figure S2.

<sup>a</sup> Key Laboratory of Bioelectrochemistry & Environmental Analysis of Gansu Province, College of Chemistry & Chemical Engineering, Northwest Normal University, 730070, China; E-mail: taaluxq@gmail.com

<sup>b</sup> College of Chemistry and Chemical Engineering, Lanzhou University.

\* Corresponding author

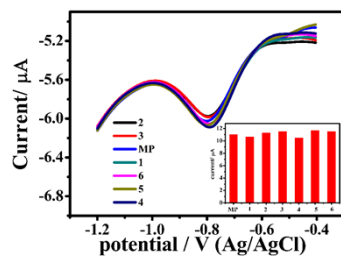

### Figure Captions

**Fig.S1** EDS spectrum of the synthesized  $\text{ZrO}_2/\text{OMP}/\text{GCE}$ .

**Table S1** The corresponding element content of EDS results of the  $\text{ZrO}_2/\text{OMP}/\text{GCE}$ .

**Fig. S2** Effect of interferences on the response currents. Experiments were performed with 0.1 M  $\text{KClO}_4$  (pH 6.0) containing 0.1 mM MP in the absence and presence of 20-fold carbaryl (1), nitrobenzene (2), p-nitrophenol (3) and 0.1 M  $\text{PO}_4^{3-}$  (4),  $\text{CO}_2^{2-}$  (5),  $\text{NO}_3^-$  (6). Histogram inset was relationship between peak current and added different interferences substances.
